# Supplementary material for: Direct coating of gold nanolayers to enhance the oxidation resistance of copper nanowire flexible transparent conductive films
Source: Royal Society of Chemistry journal article supplement (doi:10.1039/d3cp04255c), 2023-01-01
Supplement: d3cp04255c1.pdf [file d3cp04255c1.pdf]

## Electronic Supplementary Information

### Direct coating of gold nanolayers to enhance the oxidation resistance of copper nanowire flexible transparent conductive films†

Quan Xiong,<sup>a</sup> Xingzhong Zhu,<sup>\*a,b</sup> Juan Xu,<sup>a,b</sup> WeiQiang Yuan,<sup>a</sup> JiZhe Zhang,<sup>a</sup> and CaiXia Kan<sup>\*a,b</sup>

<sup>a</sup> College of Science, Nanjing University of Aeronautics and Astronautics, Nanjing 210016, China. E-mail: xzzhu@nuaa.edu.cn; cxkan@nuaa.edu.cn

<sup>b</sup> Key Laboratory of Aerospace Information Materials and Physics (NUAA), MIIT, Nanjing 211106, China.

### Supplementary figures

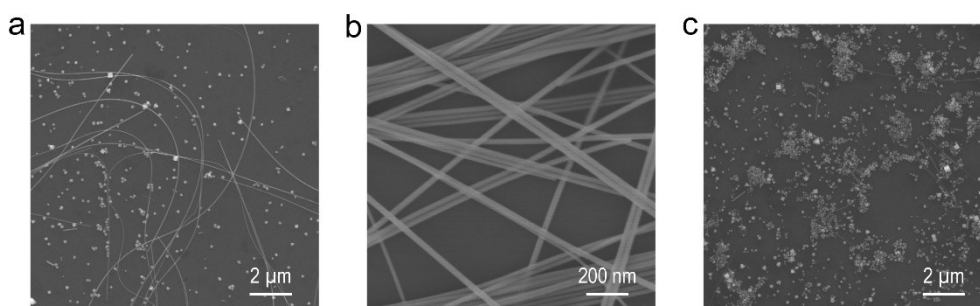

**Fig. S1.** SEM images of Cu nanowires (a) before and (b) after purification. (c) SEM image of the impurity among purification process.

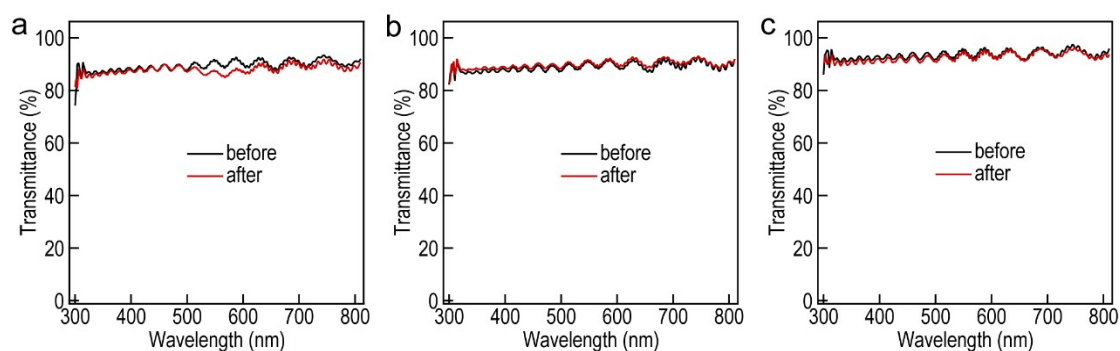

**Fig. S2.** Film transmittance before and after treatment with different concentrations (0.025, 0.25, 2.5 mM) of  $\text{HAuCl}_4$ .

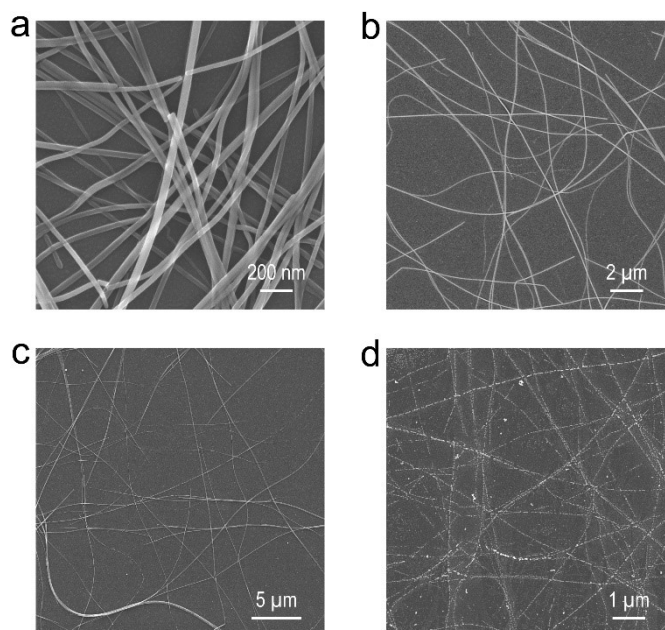

**Fig. S3.** SEM images of films (a) before and (b) after 0.025 mM  $\text{HAuCl}_4$  treatment. (c) after 0.25 mM  $\text{HAuCl}_4$  treatment. (d) after 2.5 mM  $\text{HAuCl}_4$  treatment.

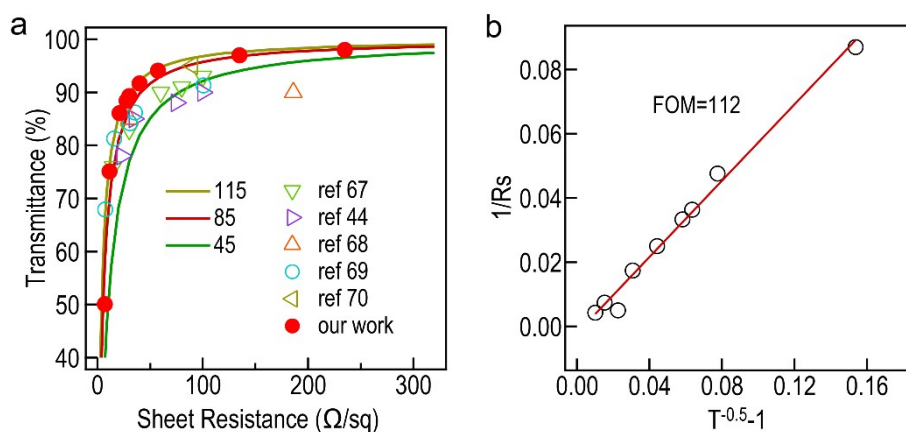

**Fig. S4.** (a) A plot of the optical transmittance ( $\lambda = 550$  nm) versus sheet resistance for Cu NWs/PET films. The solid line indicates the fit to eq (1) for  $\sigma_{DC}/\sigma_{OP} = 45$  (blue), 85 (yellow), or 115 (pink). The previously reported values are also shown for comparison. (b) A plot of  $1/R_s$  as a function of  $(T^{-0.5}-1)$  for the Cu NW/PET films.

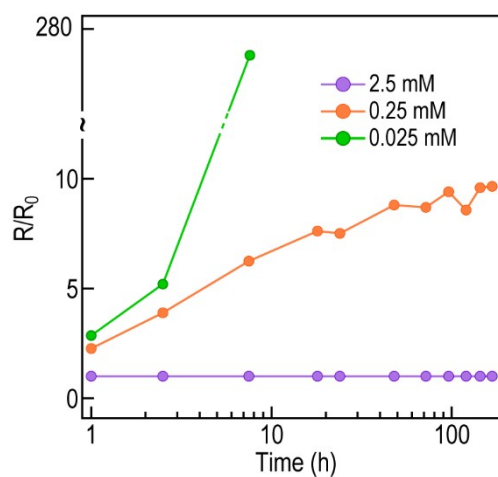

**Fig. S5.** Stability of the Cu@Au NWs/PET films in high temperature and high humidity environment (temperature = 80 °C, humidity = 80 ± 5%).

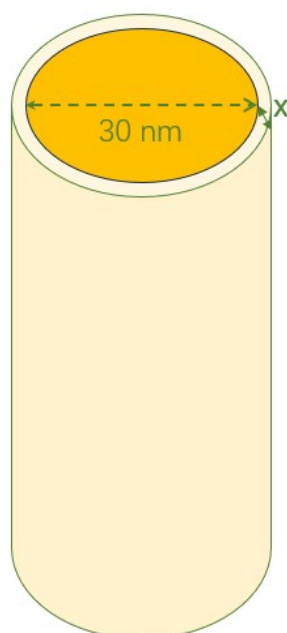

**Fig. S6.** Schematic model of the size of Cu@Au core and shell.

#### **Analysis of the composition of Cu@Au NW:**

In this context, it is posited that the nanowires exhibit full atom occupancy without any gaps. The Au shell's thickness is designated as  $x$  nanometers. The Number of Au atoms can be calculated as follows:

$$N_{Au} = \frac{v_{Au}}{\frac{4}{3}\pi r_{Au}^3}$$

Where  $v_{Au}$  is defined as:

$$v_{Au} = \pi((15 + x)^2 - 15^2) * h$$

The number of Cu atoms can be computed as:

$$N_{Cu} = \frac{v_{Cu}}{\frac{4}{3}\pi r_{Cu}^3}$$

Where  $v_{Cu}$  is represented by:

$$v_{Cu} = 15^2\pi * h$$

Considering the Molar ratio of Cu to Au:  $n_{Cu}:n_{Au} = 95:5$  (determined via surface scanning with energy-dispersive spectroscopy), and  $x \sim 0.56$  nm, the number of layers of gold atoms can be approximated as:

$$N = \frac{x}{d_{Au}} = \frac{0.56}{0.268} \approx 2$$

## Supplementary tables

**Table S1** Performance comparison between our films and other films.

| Ref.     | Dimensions                                             | Photoelectric performance | Base  | Protective metal | Thickness of protective layer | Stability |
|----------|--------------------------------------------------------|---------------------------|-------|------------------|-------------------------------|-----------|
| Ref. 1   | Average Width: 75±19 nm<br>Average Length: 28.4±7.1 μm | 60 Ω/sq at 84.3%          | Glass | Ni               | ~41 nm                        | 30 days   |
| Ref. 2   | Average Width: 21±4 nm<br>Average Length: 10-20 μm     | 50 Ω/sq at 90%            | Glass | Au               | ~2 nm                         | 712 hours |
| Ref. 3   | Average Width: ~35 nm<br>Average Length: >50 μm        | 62.4 Ω/sq at 80%          | PDMS  | Ni               | ~10 nm                        | 3 years   |
| Our Work | Average Width: 27 nm<br>Average Length: >10 μm         | 30 Ω/sq at 90%            | PET   | Au               | ~1 nm                         | >75 days  |

## References

- (1) A. R. Rathmell, M. Nguyen, M. Chi, B. J. Wiley, *Nano Lett.*, 2012, **12**, 3193–3199.
- (2) Z. Q. Niu, F. Cui, Y. Yu, B. Nigel, Y. C. Sun, K. Garo, D. Kim, L. Dou, D. Ahmad, S. Kerstin and P. D. Yang, *J. Am. Chem. Soc.*, 2017, **139**, 7348–7354.
- (3) J. Z. Song, J. H. Li, J. Y. Xu and H. B. Zeng, *Nano Lett.*, 2014, **14**, 6298–6305.
